# Supplementary material for: The relationship between the female athlete triad and injury rates in collegiate female athletes
Source: PeerJ. 2021 Apr 6;9:e11092. doi: 10.7717/peerj.11092 (PMC8034341; doi:10.7717/peerj.11092)
Supplement: Supplemental Information 1 [file peerj-09-11092-s001.xlsx]

## Sheet: basic data
	events	No													Low energy availavility		stress fracture		FAT score
			height	weight	BMI	Zscore	age	IBW	85％IBW	90％IBW	Number of menstruation	Amenorrhea	Menarche	Amenorrhea(teenage)	dietary	DE/ED	age	times
			ｍ	kg		%
	volleyball	1	1.643	57.5	21.3006	124	21				12		15	0	0	0		0	1
	volleyball	2	1.635	61.2	22.8937	158	21				15		12	0	1	0	10	1	2
	volleyball	3	1.741	65.6	21.6424	139	20				12		13	0	0	0		1	1
	volleyball	4	1.749	67.2	21.968	120	18	67.298	57.2033	60.5682	12		12	0	0	0	13	1	1
	volleyball	5	1.686	63.4	22.3036	117	20				12		13	0	0	0		0	0
	volleyball	6	1.727	65.9	22.0953	134	20				12		11	0	0	0	18	2	2
	volleyball	7	1.658	62.6	22.7722	132	21				13		11	0	0	0	17	1	1
	volleyball	8	1.732	64.8	21.6013	130	20				11		12	0	0	0	18	1	1
	volleyball	9	1.714	75.4	25.6655	125	18	64.6315	54.9368	58.1684	3	12M	12	1	0	0		0	2
	volleyball	10	1.627	56.2	21.2305	130	18	58.2368	49.5013	52.4132	15		14	0	0	0		0	0
	volleyball	11	1.644	52.5	19.4248	110	21				12		13	0	0	0		0	0
	volleyball	12	1.704	55.1	18.9763	116	21				12		15	0	0	0		0	1
	volleyball	13	1.698	60.3	20.9142	115	18	63.4305	53.9159	57.0874	12		11	0	0	0	15	1	1
	volleyball	14	1.728	68	22.7731	117	20				12		12	0	0	0	17	1	1
	volleyball	15	1.573	48.9	19.7629	124	19	54.4352	46.27	48.9917	12		12	0	0	0		0	1
	volleyball	16	1.654	61.2	22.3707	118	18	60.1858	51.1579	54.1672	12		14	0	0	0		0	0
	volleyball	17	1.592	62.9	24.8179	132	19	55.7582	47.3945	50.1824	13		14	0	1	0		0	0
	athletics long-distance	18	1.686	60.5	21.2834	141	18	62.5371	53.1565	56.2834	12		15	0	0	0		0	1
	athletics long-distance	19	1.586	51.3	20.3944	128	23				11		15	1	0	0	15,16,18,20,22	5	3
	athletics long-distance	20	1.647	45	16.5892	131	21				12		12	0	0	0	16	1	3
	athletics long-distance	21	1.596	51	20.0219	101	20				12		13	0	0	1	20	1	2
	athletics long-distance	22	1.555	48.8	20.1818	117	21				2		17	1	0	0	13/21	2	6
	athletics long-distance	23	1.573	49.4	19.965	123	20				10		15	1	0	1	16-19	5	4
	athletics long-distance	24	1.639	53.8	20.0274	140	20				14		14	1	0	0	19	1	1
	athletics long-distance	25	1.634	58.1	21.7607	125	21				9		15	1	0	0	15	1	3
	basketball	26	1.606	54.6	21.1691	105	22				12		12	0	0	0	17	1	1
	basketball	27	1.686	59.2	20.826	121	22				12		13	0	0	0		0	0
	basketball	28	1.71	65.4	22.3659	138	21				12		13	0	0	0		0	0
	basketball	29	1.696	67	23.2929	127	22				12		14	0	0	0		0	0
	basketball	30	1.564	51.3	20.9722	138	22				20		13	0	0	0		0	0
	basketball	31	1.715	66.2	22.5076	133	21				12		12	0	0	0		0	0
	basketball	32	1.741	61.1	20.1578	116	22				11		12	1	0	0		0	0
	basketball	33	1.596	52.9	20.7678	120	20				11		12	0	0	0		0	0
	basketball	34	1.734	70	23.2809	139	19	66.1486	56.2263	59.5338	12		15	0	0	0		0	1
	basketball	35	1.741	73.2	24.1498	136	21				11		12	0	0	0		0	0
	basketball	36	1.661	64.9	23.5237	112	20				5		14	0	1	0	15	1	4
	basketball	37	1.773	86.2	27.4214	112	19	69.1576	58.784	62.2419	12		12	0	0	0		0	0
	basketball	38	1.696	54.3	18.8777	132	20				0	36M	15	1	0	0		0	3
	basketball	39	1.554	52.8	21.8641	138	19	53.1282	45.1589	47.8153	12		14	0	0	0		0	0
	basketball	40	1.628	52	19.6198	125	19	58.3084	49.5622	52.4776	12		13	0	0	0		0	1
	basketball	41	1.672	65.5	23.4298	152	19	61.5028	52.2774	55.3526	10		16	0	1	0		0	1
	basketball	42	1.64	52.1	19.3709	116	20				6		14	0	0	0		0	1
	basketball	43	1.677	56.5	20.0901	124	20				16		12	0	0	0	16	1	1
	basketball	44	1.642	55.2	20.4735	158	19	59.3156	50.4183	53.384	2	5M	18	0	0	0		0	4
	basketball	45	1.763	72.2	23.2291	135	19	68.3797	58.1228	61.5417	12		13	0	0	0		0	0
	basketball	46	1.738	63.4	20.9889	133	20				12		11	0	0	0		0	0
	basketball	47	1.666	55.6	20.032	133	19	61.0622	51.9029	54.956	12		15	0	0	0	16	1	2
	basketball	48	1.666	53	19.0953	130	20				12		12	0	0	0		0	0
	basketball	49	1.739	62.1	20.5349	132	19	66.5307	56.5511	59.8776	12		14	0	0	0		0	0
	basketball	50	1.74	78.6	25.9612	133	18	66.6072	56.6161	59.9465	12		12	0	0	0	18	1	1
	basketball	51	1.62	54.3	20.6904	124	19	57.7368	49.0763	51.9631	8		13	0	0	0	18	1	2
	athletics sprint	52	1.568	56.9	23.143	161	19	54.0897	45.9763	48.6808	12		13	0	0	0		0	0
	athletics sprint	53	1.565	50.2	20.4963	138	18	53.8829	45.8005	48.4947	12		11	0	0	0	17	1	1
	athletics sprint	54	1.597	54.6	21.4083	124	19	56.109	47.6926	50.4981	12		11	1	0	0		0	0
	athletics sprint	55	1.57	45	18.2563	109	19	54.2278	46.0936	48.805	8		14	0	0	0	16	3	5
	athletics sprint	56	1.554	47.9	19.8351	126	19	53.1282	45.1589	47.8153	7	5M	12	0	0	0		0	1
	athletics sprint	57	1.614	48.7	18.6948	143	21				10		13	0	0	0	20	1	1
	athletics sprint	58	1.7	46.1	15.9516	140	19	63.58	54.043	57.222	12		14	0	0	0		0	2
	athletics sprint	59	1.659	53.3	19.3658	133	19	60.5502	51.4677	54.4952	6		14	0	0	0		0	2
	athletics sprint	60	1.609	54.4	21.0129	125	19	56.9554	48.4121	51.2598	12		12	0	1	0	17	1	2
	athletics sprint	61	1.6	51.3	20.0391	115	19	56.32	47.872	50.688	12		12	0	1	0		0	1
	athletics sprint	62	1.652	52.2	19.1272	119	18	60.0403	51.0342	54.0363	12		14	0	0	0		0	0
	athletics sprint	63	1.608	61.8	23.901	135	18	56.8846	48.3519	51.1961	11		14	0	0	0		0	0
	athletics sprint	64	1.592	48.9	19.294	117	18	55.7582	47.3945	50.1824	11		11	0	0	0	16	1	2
	athletics sprint	65	1.547	47.5	19.8478	132	20				12		12	0	0	0	14	1	1
	athletics sprint	66	1.608	52.1	20.1496	144	20				9		10	0	0	0			1
	athletics sprint	67	1.61	47.3	18.2478	115	20				11		13	0	0	0			1
	athletics sprint	68	1.665	55.8	20.1282	109	20				13		14	0	1	0	16	1	2
	athletics sprint	69	1.721	56.8	19.1773	111	20				5		15	0	0	0	14	1	4
	athletics sprint	70	1.678	52.5	18.6456	127	20				9		15	0	0	0	13	1	3
	soccer	71	1.595	51.7	20.3221	131	20				12		12	0	0	0		0	0
	soccer	72	1.563	48.9	20.0166	130	20				12		14	0	0	0		0	0
	soccer	73	1.65	57.9	21.2672	128	20				5		14	0	0	0	14	1	3
	soccer	74	1.541	46.1	19.4131	130	19	52.243	44.4065	47.0187	12		15	0	0	0		0	2
	soccer	75	1.546	48.7	20.3756	144	19	52.5826	44.6952	47.3243	12		13	0	0	0		0	0
	soccer	76	1.604	47	18.2679	119	19	56.602	48.1117	50.9418	12		12	0	0	0	14	1	3
	soccer	77	1.646	57.4	21.1862	138	18	59.605	50.6642	53.6445	10		12	0	0	0		0	0
	soccer	78	1.549	49.2	20.5051	131	19	52.7868	44.8688	47.5081	12		14	0	0	0		0	0
	soccer	79	1.646	69.5	25.6522	139	19	59.605	50.6642	53.6445	14		12	0	1	0	17	1	2
	soccer	80	1.659	61	22.1634	144	18	60.5502	51.4677	54.4952	11		14	0	0	0		0	0
	soccer	81	1.56	49	20.1348	125	18	53.5392	45.5083	48.1853	8		15	1	0	0		0	2
	soccer	82	1.587	51	20.2496	147	19	55.4085	47.0972	49.8677	1	7M	13	0	1	0		0	3
	soccer	83	1.672	71.4	25.5403	149	18	61.5028	52.2774	55.3526	11		15	0	0	0	16	1	2
	soccer	84	1.586	52.5	20.8715	152	18	55.3387	47.0379	49.8048	11		12	0	0	0	12	1	1
	soccer	85	1.649	63.9	23.4996	151	19	59.8224	50.8491	53.8402	12		13	1	0	0		0	0
	soccer	86	1.621	60	22.8342	183	22				14		14	0	0	0		0	0
	soccer	87	1.524	63.3	27.2542	123	22				11		12	0	0	0	17	1	1
	soccer	88	1.562	50.8	20.821	140	22				12		14	0	0	0		0	0
	soccer	89	1.668	69.3	24.9081	134	22				12		14	0	0	0	16	1	1
	soccer	90	1.547	54.8	22.8981	156	22				12		14	0	0	0		0	0
	soccer	91	1.543	46	19.3208	120	21				12		13	0	0	0		0	0
	soccer	92	1.653	52.7	19.287	166	21				13		13	0	0	0	20	1	1
	soccer	93	1.562	53.2	21.8047	125	20				12		14	0	0	0		0	0
	soccer	94	1.608	54.4	21.0391	140	20				12		14	0	0	0		0	0
	soccer	95	1.534	45.6	19.3782	177	21				12		14	0	0	0		0	0
	soccer	96	1.62	55.7	21.2239	123	21				12		15	0	0	0	17	1	2
	soccer	97	1.629	60.5	22.7989	133	20				12		12	0	0	0		0	0
	athletics throwing/jumping	98	1.601	55.1	21.4966	132	23				12		12	0	0	0		0	0
	athletics throwing/jumping	99	1.552	49.1	20.3844	110	21				12		12	0	1	1		0	0
	athletics throwing/jumping	100	1.645	64.9	23.9835	111	21				15		14	0	0	0		0	0
	athletics throwing/jumping	101	1.685	52.4	18.4557	131	21				11		15	0	0	0		0	2
	athletics throwing/jumping	102	1.732	71.8	23.9347	117	20				12		11	0	0	0	13-18	1	1
	athletics throwing/jumping	103	1.632	62.2	23.3534	104	19	58.5953	49.806	52.7358	7		12	0	0	0		0	1
	athletics throwing/jumping	104	1.64	55.4	20.5979	126	21				12		12	0	0	0	11	1	0
	athletics throwing/jumping	105	1.611	56.9	21.9241	130	18	57.0971	48.5325	51.3874	12		12	0	0	0	13	1	1
	swimming	106	1.604	53.8	20.9109	111	19	56.602	48.1117	50.9418	16		12	0	0	1		0	1
	swimming	107	1.556	50.9	21.0232	109	20				10		13	0	0	0		0	0
	swimming	108	1.574	49	19.7782	111	20				10		13	0	0	0		0	0
	swimming	109	1.621	58.4	22.2253	102	20				11		13	0	0	0		0	0
	swimming	110	1.558	51	21.0104	114	20				14		13	0	0	0		0	0
	swimming	111	1.678	62.4	22.1616	144	21				16		11	0	0	0		0	0
	swimming	112	1.664	62.2	22.4638	101	21				12		11	0	0	0		0	0
	swimming	113	1.6	55.6	21.7187	127	20				12		13	0	0	0		0	0
	swimming	114	1.64	58.9	21.8992	98	18	59.1712	50.2955	53.2541	12		13	0	1	0		0	1
	swimming	115	1.598	61.8	24.2011	120	19	56.1793	47.7524	50.5614	12		12	0	0	0		0	0
	swimming	116	1.656	58.7	21.4051	111	19	60.3314	51.2817	54.2983	12		13	0	0	0		0	0
	average						19.8362
	SD						1.2507

## Sheet: injury data
	event	FAT score	injury date	recovery date	return period	location	diagnosis
	Soccer	0	2020-05-13	2020-05-16	3	Knee	Lesion of meniscus or cartilage
	Soccer	0	2020-05-06	2020-05-08	2	Knee	Lesion of meniscus or cartilage
	Soccer	0	2020-04-29	2020-05-01	2	Thigh	Contusion / hematoma/ bruise
	Soccer	0	2020-03-30	2020-03-31	1	Thigh	Strain / muscle rupture / tear
	Soccer	0	2020-10-18	2020-10-31	13	Lower leg	Strain / muscle rupture / tear
	Soccer	0	2020-06-23	2020-07-10	17	Head	Concussion
	Soccer	0	2020-12-23	2020-12-30	7	Head	Concussion
	Soccer	0	2020-04-22	2020-04-24	2	Foot/toe	Contusion / hematoma/ bruise
	Soccer	0	2020-07-13	2020-07-24	11	Lower leg	Strain / muscle rupture / tear
	Soccer	0	2020-06-16	2020-06-20	4	Ankle	Sprain
	Soccer	0	2020-07-09	2020-07-11	2	Others (heatstroke)	Others (nail trouble, heatstroke)
	Soccer	0	2020-10-27	2020-12-15	49	Lumbar spine / lower back	Contusion / hematoma/ bruise
	Soccer	0	2020-10-23	2020-10-30	7	Thigh	Muscle cramps or spasm
	Soccer	0	2020-07-21	2020-07-26	5	Knee	Tendinosis / tendinopathy
	Soccer	0	2020-02-07	2020-03-25	46	Foot/toe	Tendinosis / tendinopathy
	Soccer	0	2020-07-21	2020-08-07	17	Lower leg	Strain / muscle rupture / tear
	Soccer	0	2020-09-27	2020-10-30	33	Finger	Dislocation, subluxation
	Soccer	0	2020-06-08	2020-06-12	4	Foot/toe	Others (nail trouble, heatstroke)
	Soccer	0	2020-04-17	2020-05-08	21	Ankle	Sprain
	Soccer	0	2020-06-03	2020-03-31	301	Knee	Ligamentous rupture
	Soccer	0	2020-05-22	2020-03-31	313	Knee	Ligamentous rupture
	Soccer	0	2020-05-09	2020-05-22	13	Ankle	Arthritis/Synovitis/Bursistis
	Basketball	0	2020-09-07	2020-09-21	14	Ankle	Sprain
	Basketball	0	2020-04-15	2020-04-20	5	Face (incl. eye, ear, nose)	Concussion
	Basketball	0	2020-12-15	2020-12-20	5	Finger	Fracture
	Basketball	0	2020-03-20	2020-03-24	4	Head	Concussion
	Volleyball	0	2020-07-02	2020-07-09	7	Lumbar spine / lower back	Contusion / hematoma/ bruise
	Volleyball	0	2020-09-18	2020-10-20	32	Ankle	Sprain
	Swimming	0	2020-11-17	2020-11-26	9	Knee	Dislocation, subluxation
	Swimming	0	2020-02-03	2020-02-11	8	Knee	Dislocation, subluxation
	Athletics throwing/jumping	0	2020-12-12	2020-04-13	122	Shoulder / clavicle	Dislocation, subluxation
	Soccer	1	2020-08-04	2020-11-27	115	Wrist	Sprain
	Soccer	1	2020-07-24	2020-08-04	11	Others (heatstroke)	Others (nail trouble, heatstroke)
	Soccer	1	2020-07-18	2020-08-13	26	Knee	Tendinosis / tendinopathy
	Basketball	1	2020-03-25	2020-04-15	21	Knee	Lesion of meniscus or cartilage
	Basketball	1	2020-03-18	2020-03-21	3	Thigh	Contusion / hematoma/ bruise
	Basketball	1	2020-09-22	2020-09-27	5	Lumbar spine / lower back	Contusion / hematoma/ bruise
	Volleyball	1	2020-06-07	2020-06-16	9	Ankle	Sprain
	Volleyball	1	2020-01-10	2020-04-13	93	Ankle	Fracture
	Volleyball	1	2020-05-18	2020-05-19	1	Knee	Tendinosis / tendinopathy
	Volleyball	1	2020-06-22	2020-08-13	52	Ankle	Sprain
	Swimming	1	2020-02-05	2020-03-25	48	Neck / cervical spine	Nerve injury / spinal cord injury
	Swimming	1	2020-09-12	2020-01-01	111	Shoulder / clavicle	Dislocation, subluxation
	Athletics throwing/jumping	1	2020-10-21	2020-04-13	174	Elbow	Sprain
	Soccer	2	2020-07-11	2020-07-24	13	Lower leg	Other bone injuries
	Soccer	2	2020-02-19	2020-02-26	7	Knee	Tendinosis / tendinopathy
	Soccer	2	2020-03-26	2020-05-08	43	Ankle	Stress fracture
	Soccer	2	2020-01-18	2020-03-31	72	Ankle	Arthritis/Synovitis/Bursistis
	Soccer	2	2020-05-19	2020-06-19	31	Ankle	Arthritis/Synovitis/Bursistis
	Soccer	2	2020-04-29	2020-06-19	51	Knee	Tendinosis / tendinopathy
	Soccer	2	2020-09-25	2020-10-17	387	Lumbar spine / lower back	Muscle cramps or spasm
	Soccer	2	2020-08-11	2020-09-18	38	Ankle	Sprain
	Soccer	2	2020-06-03	2020-06-12	9	Hip	Arthritis/Synovitis/Bursistis
	Soccer	2	2020-07-01	2020-07-03	2	Others (heatstroke)	Others (nail trouble, heatstroke)
	Basketball	2	2020-12-15	2020-02-07	54	Ankle	Sprain
	Volleyball	2	2020-04-18	2020-06-05	48	Knee	Dislocation, subluxation
	Volleyball	2	2020-05-29	2020-06-26	28	Ankle	Sprain
	Athletics throwing/jumping	2	2020-05-22	2020-05-28	6	Ankle	Sprain
	Athletics long-distance	2	2020-04-10	2020-07-10	91	Thigh	Stress fracture
	Soccer	3	2020-07-30	2020-08-26	27	Hip	Arthritis/Synovitis/Bursistis
	Soccer	3	2020-12-09	2020-12-21	12	Head	Concussion
	Basketball	4	2020-09-26	2020-09-28	2	Ankle	Sprain
	Athletics throwing/jumping	4	2020-07-01	2020-07-14	13	Ankle	Sprain
	Athletics long-distance	4	2020-04-10	2020-07-10	91	Thigh	Stress fracture
	Athletics long-distance	6	2020-05-22	2020-07-10	49	Lower leg	Stress fracture
